# Supplementary material for: Comparative mitogenomic analysis of mirid bugs (Hemiptera: Miridae) and evaluation of potential DNA barcoding markers
Source: PeerJ. 2017 Aug 3;5:e3661. doi: 10.7717/peerj.3661 (PMC5545108; doi:10.7717/peerj.3661)
Supplement: Table S1 [file peerj-05-3661-s005.xlsx]

## Sheet: Sheet1
Table S1. Primers used in this study.
Apolygus lucorum
Fragment	Primer name	Sequence (5'-3')	Reference
1	TM-J210	AATTAAGCTATTAGGTTCATACCC	Simon et al. 2006
	C1-N2353	GCTCGTGTATCAATATCTATWCC	Simon et al. 2006
2	C1-J1709	AATTGGWGGWTTYGGAAAYTG	Simon et al. 2006
	C1-N2776	GATAATCTGAGTATCGWCGNGG	Simon et al. 2006
3	LLD-F1	GGGGTAATTTTGGCCAACTC	this study
	LLB-R1	TGATTTAATCGTCCGGGTGT	this study
4	C2-J3399	ACAATTGGTCAYCAATGATAYTG	Simon et al. 2006
	C3-N4908	CGTGAAAYATCTCGTCATCATTG	Simon et al. 2006
5	C3-J4792	GTTGATTATAGACCWTGRCC	Simon et al. 2006
	TN-N6160	TCAATTTTRTCATTAACAGTGA	Simon et al. 2006
6	LLC-F1	AACGGAATCCTAGAATGAGCA	this study
	LLN-R1	GGTTGGGATGGGTTAGGATT	this study
7	N5-J7572	AAAGGGAATTTGAGCTCTTTTWGT	Simon et al. 2006
	N4-N8727	AAATCTTTRATTGCTTATTCWTC	Simon et al. 2006
8	LLN-F1	CCAGATGAACAGAGACCATGC	this study
	LLH-R2	AGAAGATTAGTAATAACAGTTGCTCCT	this study
9	CB-J10933	GTTCTACCTTGAGGNCAAATRTC	Simon et al. 2006
	N1-N12595	GTWGCTTTTTTAACTTTATTRGARCG	Simon et al. 2006
10	N1-J12261	TACTTCATAAGAAATAGTYTGRGC	Simon et al. 2006
	LR-N13000	TTACCTTAGGGATAACAGCGTAA	Simon et al. 2006
11	LR-J12888	CCGGTTTGAACTCARATCATGTA	Simon et al. 2006
	SR-N14220	ATATGYACAYATTGCCCGTC	Simon et al. 2006
12	SR-J14197	TACCYCTACTTTGTTACGACTT	Simon et al. 2006
	SR-N14745	GTGCCAGCAGYYGCGGTTANAC	Simon et al. 2006
13	LLK-F1	CTCTGAACAGCTAAATTACCGCC	this study
	LMC-CR-R2	CATTAATTCAGGGAATCATATATG	this study
Adelphocoris lineolatus
Fragment	Primer name	Sequence (5'-3')	Reference
1	MC-N2-J586	CCNYTTCATAWATGAWTNCC	modified from Simon et al. 2006
	MC-C1-N2353	GCTCGTGTRTCTACRTCYATNC	modified from Simon et al. 2006
2	ALC1-F1	ATCTTTCTTCGACCCAGCAG	this study
	ALC3-R1	AAGTGCCCCAATTGATCTTG	this study
3	MC-C3-J4792	GTGGATTATAGACCWTGRCC	modified from Simon et al. 2006
	MC-TN-N6160	TCAATWTTTTCATTAACARTGA	modified from Simon et al. 2006
4	ALC3-F1	CCTAGAATGAGCTAAATGGGGT	this study
	ALN4-R1	TGCTTATTCTTCTGTGGCTCA	this study
5	MC-N4-J8641	CCAGAAGAACATAANCCRTG	modified from Simon et al. 2006
	MC-CB-N10608	CCAAGTARTGAWCCAAARTTTCA	modified from Simon et al. 2006
6	ALCB-F1	TCTCTGAAGGACCTATGCGCT	this study
	ALN1-R1	TGGAATGGGAGTTTATGGAGTT	this study
7	MC-N1-J12261	WACYTCATAWGAAATARYTTGAGC	modified from Simon et al. 2006
	MC-LR-N13000	TTACCTTAGGGATAACAGCGTTA	modified from Simon et al. 2006
8	MC-LR-J12888	CCGGTYTGAACTCAGATCATGTA	modified from Simon et al. 2006
	MC-SR-N14220	TTATGYACAYATYGCCCGTC	modified from Simon et al. 2006
9	ALSR-F1	TTTGACATTCTAGATTCATTTTCCA	this study
	ALN2-N150	CTATACTTAGGGTATGAACCTAATAGCT	this study
10	ALCR-F1	TGGGCAGATAGCTGAACTTGT	this study
	ALN2-R2	TTGTGTTGATGTATGATTTAACCCT	this study
Adelphocoris fasciaticollis
Fragment	Primer name	Sequence (5'-3')	Reference
1	AFTM-J140	GCTAAATAAGCTATTAGGTTCATACC	this study
	AFC1-R1	GCTCGTGTATCAACATCTATTCC	this study
2	C1-J1709	AATTGGWGGWTTYGGAAAYTG	Simon et al. 2006
	C1-N2776	GATAATCTGAGTATCGWCGNGG	Simon et al. 2006
3	AFC1-J2640	ACATTTTTCCCACAACACTTC	this study
	AFC2-N3580	CCGCAAATCTCAGAACATTG	this study
4	AFC2-J3270	GCAATTGGACATCAATGATATTG	modified from Simon et al. 2006
	AFC3-N4800	CGAATAATATCTCGTCATCATTG	modified from Simon et al. 2006
5	AFC3-J4640	GTAGATTATAGACCATGACCATTAAC	this study
	AFN5-N6850	TTCTAAAGATTTAATTTTGGAGGT	this study
6	AFC-F1	TGAAAAACATAATTACCCGAACCT	this study
	AFE-R1	TGGATTGGGTGCTAATTTTGA	this study
7	N5-J7077	TTAAATCCTTWGARTAAAAYCC	Simon et al. 2006
	N5-N7793	TTAGGTTGRGATGGNYTAGG	Simon et al. 2006
8	N5-J7572	AAAGGGAATTTGAGCTCTTTTWGT	Simon et al. 2006
	N4-N8727	AAATCTTTRATTGCTTATTCWTC	Simon et al. 2006
9	AFN-F1	CGAGACATTGTCCGCTCAT	this study
	AFCB-R1	TCGGTTAAGTGTGGCATTATCA	this study
10	AFCB-J10620	GTTTTACCATGAGGACAAATATC	this study
	AFI-R1	GGAATGGGGGTTTATGGAGT	this study
11	N1-J12261	TACTTCATAAGAAATAGTYTGRGC	Simon et al. 2006
	LR-N13000	TTACCTTAGGGATAACAGCGTAA	Simon et al. 2006
12	LR-J12888	CCGGTTTGAACTCARATCATGTA	Simon et al. 2006
	SR-N14220	ATATGYACAYATTGCCCGTC	Simon et al. 2006
Adelphocoris suturalis
Fragment	Primer name	Sequence (5'-3')	Reference
1	TM-J210	AATTAAGCTATTAGGTTCATACCC	Simon et al. 2006
	TW-N1284	TTAACTTTGAAGGTTAATAGTTT	Simon et al. 2006
2	AS-J950	TCATACCAAAATGAATCACAAT	this study
	ASC1-R	CTACTGATGCTCCATTATGTGC	this study
3	AS-J1510	GAATTAGGAATACCAGGATCAT	this study
	AS-N4710	TGTTAATGGTCATGGTCTATAATC	this study
4	ASC3-F1	CCGACCAGGATCTTTAGCTG	modified from Simon et al. 2006
	ASN5-R2	GGATTGGGTGCTAACTTTGAGT	modified from Simon et al. 2006
5	N5-J7077	TTAAATCCTTWGARTAAAAYCC	Simon et al. 2006
	N5-N7793	TTAGGTTGRGATGGNYTAGG	Simon et al. 2006
6	N5-J7572	AAAGGGAATTTGAGCTCTTTTWGT	Simon et al. 2006
	N4-N8727	AAATCTTTRATTGCTTATTCWTC	Simon et al. 2006
7	ASN4-F1	CCGTGACCAATTATTATCAAT	this study
	ASCB-R1	ACTGAAAATCCTCCTCATAGTC	this study
8	CB-J10933	GTTCTACCTTGAGGNCAAATRTC	Simon et al. 2006
	N1-N12595	GTWGCTTTTTTAACTTTATTRGARCG	Simon et al. 2006
9	N1-J12261	TACTTCATAAGAAATAGTYTGRGC	Simon et al. 2006
	LR-N13000	TTACCTTAGGGATAACAGCGTAA	Simon et al. 2006
10	LR-J12888	CCGGTTTGAACTCARATCATGTA	Simon et al. 2006
	SR-N14220	ATATGYACAYATTGCCCGTC	Simon et al. 2006
11	SR-J14197	TACCYCTACTTTGTTACGACTT	Simon et al. 2006
	SR-N14745	GTGCCAGCAGYYGCGGTTANAC	Simon et al. 2006
Lygus pratenszs
Fragment	Primer name	Sequence (5'-3')	Reference
1	TM-J210	AATTAAGCTATTAGGTTCATACCC	Simon et al. 2006
	C1-N2353	GCTCGTGTATCAATATCTATWCC	Simon et al. 2006
2	C1-J1709	AATTGGWGGWTTYGGAAAYTG	Simon et al. 2006
	C1-N2776	GATAATCTGAGTATCGWCGNGG	Simon et al. 2006
3	C1-J2756	ACATTCTTTCCTCARCAYTT	Simon et al. 2006
	C2-N3665	CCACAAATTTCTGAACATTG	Simon et al. 2006
4	C2-J3399	ACAATTGGTCAYCAATGATAYTG	Simon et al. 2006
	C3-N4908	CGTGAAAYATCTCGTCATCATTG	Simon et al. 2006
5	LPC3-J4650	TGAGAAAACATAATCACCCATTCC	modified from Simon et al. 2006
	LPN5-N6890	TATTCTAAGGATTTAATTTTGGAGGT	modified from Simon et al. 2006
6	LPN5-F1	GACATAATTACCTGAACCCATGA	this study
	LPN5-R1	TAACCGAATTGGTGATGTGG	this study
7	N5-J7572	AAAGGGAATTTGAGCTCTTTTWGT	Simon et al. 2006
	N4-N8727	AAATCTTTRATTGCTTATTCWTC	Simon et al. 2006
8	N4-J8641	CCAGAAGAACATAANCCRTG	Simon et al. 2006
	LPH-R2	TGGGTGGAATGGGATTTTATC	this study
9	CB-J10933	GTTCTACCTTGAGGNCAAATRTC	Simon et al. 2006
	N1-N12595	GTWGCTTTTTTAACTTTATTRGARCG	Simon et al. 2006
10	N1-J12261	TACTTCATAAGAAATAGTYTGRGC	Simon et al. 2006
	LR-N13000	TTACCTTAGGGATAACAGCGTAA	Simon et al. 2006
11	LR-J12888	CCGGTTTGAACTCARATCATGTA	Simon et al. 2006
	SR-N14220	ATATGYACAYATTGCCCGTC	Simon et al. 2006
12	SR-J14197	TACCYCTACTTTGTTACGACTT	Simon et al. 2006
	SR-N14745	GTGCCAGCAGYYGCGGTTANAC	Simon et al. 2006
