# Supplementary material for: Comparative mitogenomic analysis of mirid bugs (Hemiptera: Miridae) and evaluation of potential DNA barcoding markers
Source: PeerJ. 2017 Aug 3;5:e3661. doi: 10.7717/peerj.3661 (PMC5545108; doi:10.7717/peerj.3661)
Supplement: Table S3 [file peerj-05-3661-s007.xlsx]

## Sheet: Sheet1
Table S3. The annotation and organization of the mitochondrial genomes of five mirid species sequenced in this study.
		Adelphocoris fasciaticollis_YUAN							Ade. lineolatus_YUAN							Ade. suturalis_YUAN							Apolygus lucorum_YUAN							Lygus pratenszs
Gene	Strand	Position	Size (bp)	INC	Start codon	Stop codon	Anticodon		Position	Size (bp)	INC	Start codon	Stop codon	Anticodon		Position	Length (bp)	INC	Start codon	Stop codon	Anticodon		Position	Size (bp)	INC	Start codon	Stop codon	Anticodon		Position	Size (bp)	INC	Start codon	Stop codon	Anticodon
trnI	J	－	－	－					1-64	64	0			GAU		－	－	－					1-64	64	0			GAU		－	－	－
trnQ	N	－	－	－					62-129	68	-3			UUG		－	－	－					62-130	69	-3			UUG		－	－	－
trnM	J	－	－	－					129-193	65	-1			CAU		－	－	－					130-198	69	-1			CAU		－	－	－
nad2	J	1-994	994	0	ATT	T			194-1187	994	0	ATT	T			1-994	994	0	ATT	T			199-1205	1007	0	ATT	TA			1-1006	1006	0	ATT	T
trnW	J	995-1058	64	0			UCA		1188-1251	64	0			UCA		995-1058	64	0			UCA		1206-1270	65	0			UCA		1007-1071	65	0			UCA
trnC	N	1051-1112	62	-8			GCA		1244-1305	62	-8			GCA		1051-1112	62	-8			GCA		1263-1329	67	-8			GCA		1064-1126	63	-8			GCA
trnY	N	1114-1180	67	1			GUA		1307-1373	67	1			GUA		1114-1180	67	1			GUA		1330-1394	65	0			GUA		1127-1192	66	0			GUA
cox1	J	1186-2719	1534	5	ATG	T			1379-2912	1534	5	ATG	T			1186-2719	1534	5	ATG	T			1395-2928	1534	0	ATG	T			1193-2726	1534	0	ATG	T
trnL2(UUR)	J	2720-2784	65	0			UAA		2913-2977	65	0			UAA		2720-2784	65	0			UAA		2929-2993	65	0			UAA		2727-2792	66	0			UAA
cox2	J	2786-3464	679	1	ATG	T			2979-3657	679	1	ATG	T			2786-3464	679	1	ATG	T			2994-3674	681	0	ATC	TAA			2793-3473	681	0	ATC	TAA
trnK	J	3465-3535	71	0			UUU		3658-3728	71	0			UUU		3465-3535	71	0			UUU		3674-3744	70	0			CUU		3474-3543	70	0			CUU
trnD	J	3535-3599	65	-1			GUC		3728-3792	65	-1			GUC		3535-3599	65	-1			GUC		3745-3807	63	0			GUC		3547-3611	65	3			GUC
atp8	J	3600-3758	159	0	ATA	TAG			3793-3951	159	0	ATA	TAG			3600-3758	159	0	ATA	TAG			3808-3966	159	0	ATA	TAA			3612-3773	162	0	ATT	TAG
atp6	J	3752-4421	670	-7	ATG	T			3945-4614	670	-7	ATG	T			3752-4421	670	-7	ATG	T			3960-4629	670	-7	ATG	T			3767-4436	670	-7	ATG	T
cox3	J	4422-5205	784	0	ATG	T			4615-5398	784	0	ATG	T			4422-5205	784	0	ATG	T			4630-5413	784	0	ATG	T			4437-5220	784	0	ATG	T
trnG	J	5206-5267	62	0			UCC		5399-5460	62	0			UCC		5206-5267	62	0			UCC		5414-5475	62	0			UCC		5221-5282	62	0			UCC
nad3	J	5268-5619	352	0	ATA	T			5461-5812	352	0	ATA	T			5268-5619	352	0	ATA	T			5476-5827	352	0	ATA	T			5283-5634	352	0	ATA	T
trnA	J	5620-5682	63	0			UGC		5813-5875	63	0			UGC		5620-5682	63	0			UGC		5828-5889	62	0			UGC		5636-5697	62	1			UGC
trnR	J	5683-5750	68	0			UCG		5880-5943	64	4			UCG		5687-5750	64	4			UCG		5890-5954	65	0			UCG		5698-5769	72	0			UCG
trnN	J	5750-5813	64	-1			GUU		5943-6006	64	-1			GUU		5750-5813	64	-1			GUU		5952-6016	65	-3			GUU		5769-5833	65	-1			GUU
trnS1(AGN)	J	5813-5881	69	-1			UCU		6006-6074	69	-1			UCU		5813-5881	69	-1			UCU		6016-6084	69	-1			GCU		5833-5901	69	-1			GCU
trnE	J	5881-5944	64	-1			UUC		6074-6137	64	-1			UUC		5881-5945	65	-1			UUC		6084-6147	64	-1			UUC		5901-5964	64	-1			UUC
trnF	N	5957-6023	67	12			GAA		6151-6217	67	13			GAA		5962-6028	67	16			GAA		6146-6211	66	-2			GAA		5963-6026	64	-2			GAA
nad5	N	6024-7719	1696	0	ATT	T			6218-7913	1696	0	ATT	T			6029-7724	1696	0	ATT	T			6212-7919	1708	0	ATT	T			6027-7725	1699	0	ATT	T
trnH	N	7720-7783	64	0			GUG		7914-7977	64	0			GUG		7725-7788	64	0			GUG		7920-7983	64	0			GUG		7726-7789	64	0			GUG
nad4	N	7784-9110	1327	0	ATG	T			7978-9304	1327	0	ATG	T			7789-9115	1327	0	ATG	T			7984-9310	1327	0	ATG	T			7790-9116	1327	0	ATG	T
nad4L	N	9104-9409	306	-7	ATT	TAA			9298-9603	306	-7	ATT	TAA			9109-9414	306	-7	ATT	TAA			9304-9609	306	-7	ATT	TAA			9110-9415	306	-7	ATT	TAA
trnT	J	9412-9474	63	2			UGU		9606-9668	63	2			UGU		9417-9479	63	2			UGU		9612-9674	63	2			UGU		9418-9483	66	2			UGU
trnP	N	9475-9540	66	0			UGG		9669-9734	66	0			UGG		9480-9545	66	0			UGG		9675-9738	64	0			UGG		9484-9547	64	0			UGG
nad6	J	9543-10031	489	2	ATC	TAA			9737-10225	489	2	ATC	TAA			9548-10036	489	2	ATC	TAA			9740-10225	486	1	ATC	TAA			9549-10037	489	1	ATT	TAA
cob	J	10033-11166	1134	1	ATG	TAA			10227-11360	1134	1	ATG	TAA			10038-11171	1134	1	ATG	TAA			10229-11361	1133	3	ATG	TA			10147-11279	1133	109	ATG	TA
trnS2(UCN)	J	11167-11231	65	0			UGA		11361-11425	65	0			UGA		11172-11236	65	0			UGA		11362-11429	68	0			UGA		11280-11346	67	0			UGA
nad1	N	11239-12165	927	7	ATT	TAA			11433-12359	927	7	ATT	TAA			11244-12170	927	7	ATT	TAA			11437-12363	927	7	ATT	TAA			11354-12280	927	7	ATT	TAA
trnL1(CUN)	N	12166-12230	65	0			UAG		12360-12424	65	0			UAG		12171-12235	65	0			UAG		12364-12428	65	0			UAG		12281-12344	64	0			UAG
rrnL	N	12231-13459	1229	0					12425-13654	1230	0					12236-13464	1229	0					12429-13676	1248	0					12345-13593	1249	0
trnV	N	13460-13527	68	0			UAC		13655-13722	68	0			UAC		13465-13532	68	0			UAC		13677-13746	70	0			UAC		13594-13662	69	0			UAC
rrnS	N	13527-13587	60	0					13723-14519	797	0					13533-14106	574	0					13747-14540	794	0					13663-14239	577	0
Control region	J	－	－	－					14520-15433	914	0					－	－	－					14541-15647	1107	0					－	－	－
